# Supplementary material for: Baf250a orchestrates an epigenetic pathway to repress the Nkx2.5-directed contractile cardiomyocyte program in the sinoatrial node
Source: PubMed Central journal article supplement — Cell Res. 2014 Aug 22;24(10):1201–13. doi: 10.1038/cr.2014.113 (PMC4185344; doi:10.1038/cr.2014.113), 2014-08-22
Supplement: cr2014113x1.pdf [file cr2014113x1.pdf]

WT

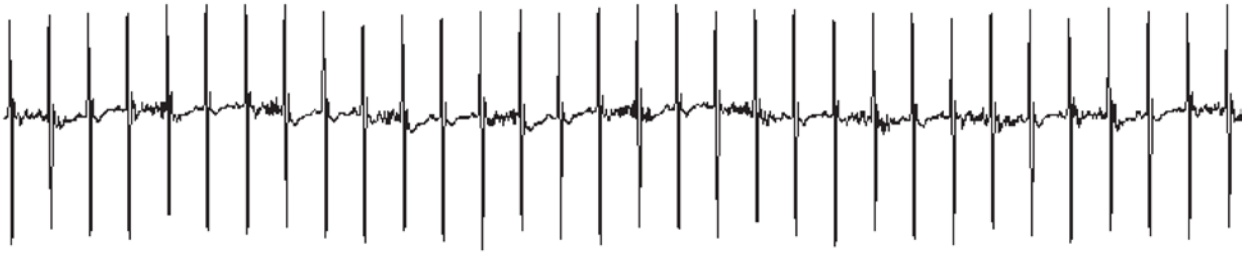

Baf250a CKO

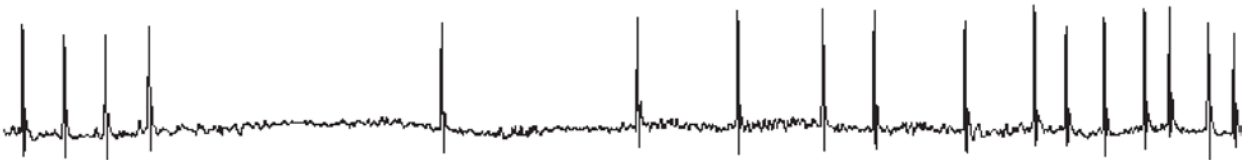

**Supplementary information, Figure S1** Loss of *Baf250a* causes sinus bradycardia as demonstrated by ambulatory ECG recording (three *Hcn4CreERT2;Baf250a<sup>f/f</sup>* as controls and three *Baf250a* CKO mice).
