# Supplementary material for: Baf250a orchestrates an epigenetic pathway to repress the Nkx2.5-directed contractile cardiomyocyte program in the sinoatrial node
Source: PubMed Central journal article supplement — Cell Res. 2014 Aug 22;24(10):1201–13. doi: 10.1038/cr.2014.113 (PMC4185344; doi:10.1038/cr.2014.113), 2014-08-22
Supplement: cr2014113x2.pdf [file cr2014113x2.pdf]

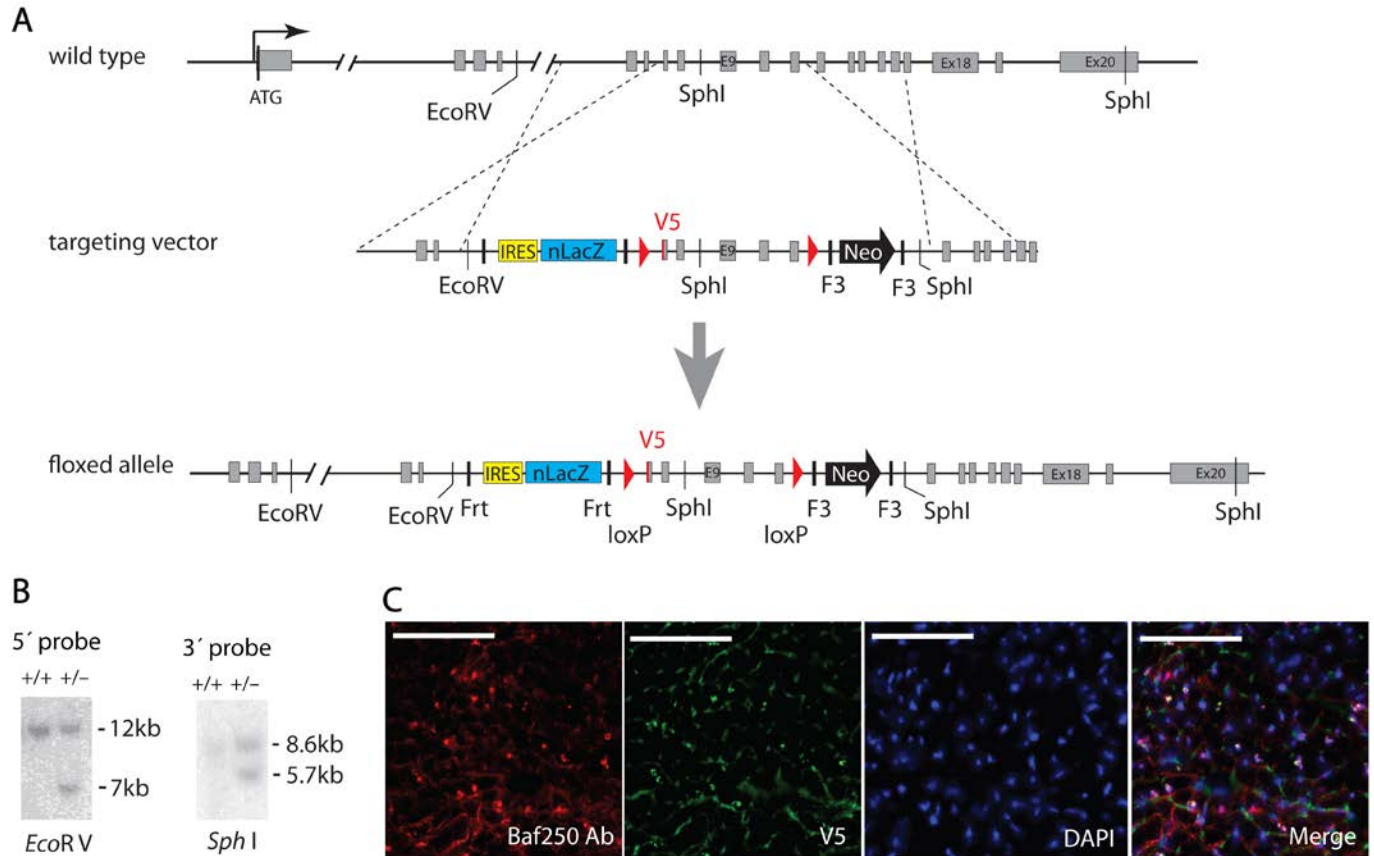

**Supplementary information, Figure S2** Generation of V5-tagged Baf250a floxed allele. **(A)** Targeting strategy to generate V5-tagged *Baf250a* floxed allele. **(B)** Targeted ES cells were identified by Southern blot using 5' and 3' probes. **(C)** The expression of Baf250a-V5 fusion protein and specificity of V5 tag were examined by double-label fluorescent immunohistochemistry. scale bar = 50  $\mu$ m.
