# Supplementary material for: Baf250a orchestrates an epigenetic pathway to repress the Nkx2.5-directed contractile cardiomyocyte program in the sinoatrial node
Source: PubMed Central journal article supplement — Cell Res. 2014 Aug 22;24(10):1201–13. doi: 10.1038/cr.2014.113 (PMC4185344; doi:10.1038/cr.2014.113), 2014-08-22
Supplement: cr2014113x3.pdf [file cr2014113x3.pdf]

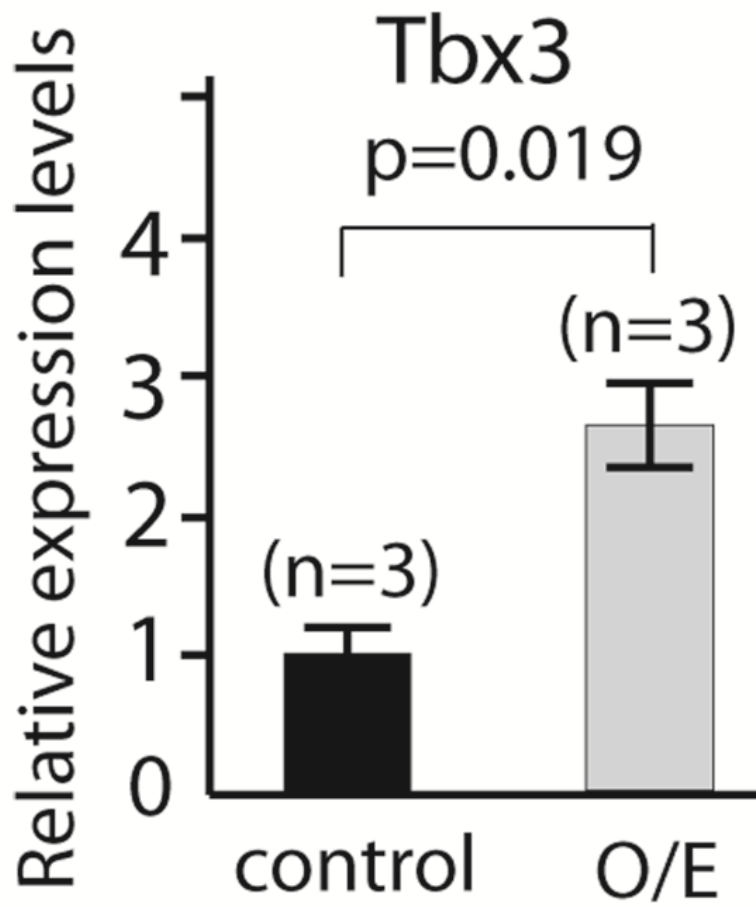

**Supplementary information, Figure S3** Overexpression of Tbx3 in embryonic heart by Lentiviral vector-mediated transduction.
