# Supplementary material for: Baf250a orchestrates an epigenetic pathway to repress the Nkx2.5-directed contractile cardiomyocyte program in the sinoatrial node
Source: PubMed Central journal article supplement — Cell Res. 2014 Aug 22;24(10):1201–13. doi: 10.1038/cr.2014.113 (PMC4185344; doi:10.1038/cr.2014.113), 2014-08-22
Supplement: cr2014113x12.pdf [file cr2014113x12.pdf]

Supplementary information, Table S9 List of primers used in the study

|                         |
|-------------------------|
| >18sRNA-F(qPCR)         |
| GTAACCCGTTGAACCCCATTC   |
| >18sRNA-R(qPCR)         |
| GCCTCACTAAACCATCCAATC   |
| >Tbx3-qPCR-F            |
| TCCACCTCCAACAACACGTTC   |
| >Tbx3-qPCR-R            |
| CAAACCTGCTGCTATCCGGCACT |
| >Err $\alpha$ -qPCR-F   |
| CCTGGTCCTAGATGAAGAGGG   |
| >Err $\alpha$ -qPCR-R   |
| CAGCTTCATACTCCAGCAGGG   |
| >Ppara $\alpha$ -qPCR-F |
| AGCTTGTTGTGGATACAGGGC   |
| >Ppara $\alpha$ -qPCR-R |
| CACTCGTACAGTCAGTTCAGT   |
| >Ppar $\gamma$ -qPCR-F  |
| CTCAGCTGTTGCGCCAAGGTGC  |
| >Ppar $\gamma$ -qPCR-R  |
| GTGCAATCAATAGAAGGAACA   |
| >Pgc1 $\alpha$ -qPCR-F  |
| GACCAGTGAACCTAAGGGATGG  |
| >Pgc1 $\alpha$ -qPCR-R  |
| GTAAAGGAAGAGCAAGAAGG    |
| >Nkx2.5(3'UTR)-qPCR-F   |
| CCGGAACGACTCCCACCTTTA   |
| >Nkx2.5(3'UTR)-qPCR-R   |
| GTCGAAAGTGCCCGTGACCCT   |

---

> Gata4(3'UTR)-qPCR-F

GGGACAGTCATGATAGCAGCT

---

> Gata4(3'UTR)-qPCR-R

TCTTGGTTCGAAGCTATTCTCT

---

>Tbx5(3'UTR)-qPCR-F

TGGTACTCAAAACTGTGTTTGT

---

>Tbx5(3'UTR)-qPCR-R

TTCCACGTTCTCAGCCACATA

---

>Kcnj2-qPCR-F

CTCCTTATCACCCCTGTTCAATG

---

>Kcnj2-qPCR-R

TACAAAACAGATGGCAAATGGG

---

>Scn5a-qPCR-F

CTTAAGACAGGTGCCGGGCTGG

---

>Scn5a-qPCR-R

CACGAAGCTTAGTGAGAAGTGC

---

>Cav1.2-qPCR-F

GGTTGTGAGTTGTGTCAGCATT

---

>Cav1.2-qPCR-R

AAGTCATTGTATTTGCTTGGCAC

---

>Nppa-qPCR-F

GGCCGTGACAAGCTTTGCCGA

---

>Nppa-qPCR-R

GCCAGCATCTCCCGTTTTTATA

---

>Serca2a-qPCR-F

CTTGTCTGAAAACCAGTCTTT

---

> Serca2a-qPCR-R

CCACAAACTTGAGCGTCTCAT

---

---

>Tbx3-ChIP-qPCR-F

AGGTGGCTGGGCGGTTCCATG

---

>Tbx3-ChIP-qPCR-R

GCTTCTCTTGTGCGGATCTGC

---

>Nkx2.5-ChIP-qPCR-F

AGTGTGTCTGGCTGGGATTTT

---

>Nkx2.5-ChIP-qPCR-R

TTCTGCGTCACCTAATATAGAC

---

>Gata4-ChIP-qPCR-F

TTGCAGTCTCCACCGGCTCGT

---

>Gata4-ChIP-qPCR-R

GAGAAGGTGACCTCGCACACT

---

>Tbx5-ChIP-qPCR-F

TAAGGCACCTTCTCCCCAAG

---

>Tbx5-ChIP-qPCR-R

CACACACCCATGGGCCTCTGC

---

>Hcn4-ChIP-qPCR-F

AACCCACATCGAATTGCTCCG

---

>Hcn4-ChIP-qPCR-R

AGTCACAGATGCGGGATCCCAG

---

>Sox1-ChIP-qPCR-F

GAGCTGGGTCTCCAATGAGCGC

---

>Sox1-ChIP-qPCR-R

AACCCAGAGCTCGCCCCCTT

---

>Tbx3-Genotyping-F

AATAGTAGATTCTCTTAGAGGAGG

---

>Tbx3-Genotyping-R

AAATTTATATCGACAGTCGTCAGC

---
