# Supplementary material for: Baf250a orchestrates an epigenetic pathway to repress the Nkx2.5-directed contractile cardiomyocyte program in the sinoatrial node
Source: PubMed Central journal article supplement — Cell Res. 2014 Aug 22;24(10):1201–13. doi: 10.1038/cr.2014.113 (PMC4185344; doi:10.1038/cr.2014.113), 2014-08-22
Supplement: cr2014113x13.pdf [file cr2014113x13.pdf]

---

**Supplementary information, Table S10** List of Antibodies using in the immunohistochemistry, immunofluorescence, co-IP, ChIP-qPCR, and Western blot

---

| <b>Product Name</b>              | <b>Vendor</b>     | <b>Catalog No.</b> | <b>Working Conc.</b>    |
|----------------------------------|-------------------|--------------------|-------------------------|
| Anti-Nkx2.5 antibody             | Abcam             | ab22611            | 1:200                   |
| Anti-Hcn4 antibody               | Abcam             | Ab32675            | 1:250                   |
| Anti-ARID1A antibody             | Novus biologicals | NBP1-88932         | 1:250                   |
| Anti-V5 Agarose Gel              | Sigma             | V8137              | 1:2000 for Western blot |
| Anti-M2 FLAG agarose             | Sigma             | F1804              | 1:3000 for Western blot |
| Anti-Tbx3 Polyclonal antibody    | Bioss             | bs-2671R           | 1:200                   |
| Anti-H3 (tri methyl K4)          | Abcam             | ab8580             | 1:200                   |
| Acetyl-histone H3                | Millipore         | 06-599             | 1:200                   |
| Rabbit Ig control<br>(ChIP-qPCR) | Santa Cruz        | sc-2027            | 1:200                   |
| Mouse Ig control<br>(ChIP-qPCR)  | Santa Cruz        | sc-2025            | 1:200                   |

---
